# Supplementary material for: UV-Vis spectrophotometric determination of rare earth elements (REE) speciation at near-neutral to alkaline pH. Part I: m-cresol purple properties from 25–75 °C and Er hydrolysis
Source: Royal Society of Chemistry journal article supplement (doi:10.1039/d4dt01515k), 2024-01-01
Supplement: d4dt01515k1.pdf [file d4dt01515k1.pdf]

**UV-Vis spectrophotometric determination of rare earth elements  
(REE) speciation at near-neutral to alkaline pH. Part I: m-cresol  
purple properties from 25-75 °C and Er hydrolysis**

Hannah Juan Han<sup>\*a</sup>, Alexander Gysi<sup>a,b</sup>

<sup>a</sup>New Mexico Bureau of Geology and Mineral Resources, New Mexico Institute of Mining and  
Technology, 801 Leroy Place, Socorro, NM 87801, USA

<sup>b</sup>Department of Earth and Environmental Science, New Mexico Institute of Mining and Technology,  
801 Leroy Place, Socorro, NM 87801, USA

\* Corresponding authors: [hannah.juan.han@nmt.edu](mailto:hannah.juan.han@nmt.edu)

*KEYWORDS: Hydrolysis, erbium, rare earth elements; UV-Vis spectrophotometry, meta-cresol  
purple, pH measurement*

### Determination of average number of OH<sup>-</sup> ligand ( $\bar{n}$ ) coordinated to Er<sup>3+</sup>

In the Er-absent mCP-NaOH solutions, the total molar amount of OH<sup>-</sup> in solutions ( $M_{\text{OH}^-}$ ) depends on the dissociation/association of mCP (R1), NaOH, and H<sub>2</sub>O (RS1-RS2),

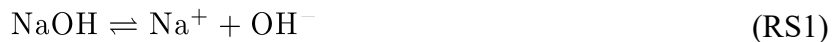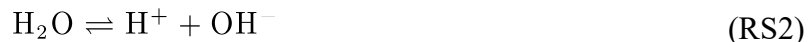

Therefore,  $M_{\text{OH}^-}$  is calculated from the molar concentration of NaOH ( $M_{\text{NaOH}}$ ) added in each experimental solution, the molar concentration of the I<sup>2-</sup> form of mCP ( $M_{\text{I}^{2-}}$ ), and the OH<sup>-</sup> released from the dissociation of water ( $M_{\text{OH}^-,w}$ ),

$$M_{\text{OH}^-} = M_{\text{NaOH}} - M_{\text{I}^{2-}} + M_{\text{OH}^-,w} \quad (\text{S1})$$

In the presence of Er<sup>3+</sup> ions in the mCP-NaOH solutions, the hydrolysis of Er<sup>3+</sup> in the reaction R2 produces protons, decreases pH, and consumes OH<sup>-</sup>. Hence, the Er hydrolysis drives reaction R1 for mCP to the left, resulting in stabilization of HI<sup>-</sup>, i.e. the protonated form of mCP. Thus the amount of OH<sup>-</sup> ligand bound to Er hydroxyl complexes ( $\sum n[\text{Er}(\text{OH})_n^{3-n}]$ ) permits reformulating Eq. S1 as follows,

$$M'_{\text{OH}^-} = M_{\text{NaOH}} - M'_{\text{I}^{2-}} - \sum n[\text{Er}(\text{OH})_n^{3-n}] + M'_{\text{OH}^-,w} \quad (\text{S2})$$

where the prime signs indicates the concentrations in the Er-bearing mCP-NaOH solutions. Finally, the number of OH<sup>-</sup> ligand bound to Er hydroxyl complexes ( $\sum n[\text{Er}(\text{OH})_n^{3-n}]$ ), can be found by the difference between Eqs. S1 and S2,

$$\sum n[\text{Er}(\text{OH})_n^{3-n}] = M_{\text{OH}^-} - M'_{\text{OH}^-} - M'_{\text{I}^{2-}} + M_{\text{I}^{2-}} + M'_{\text{OH}^-,w} - M_{\text{OH}^-,w} \quad (\text{S3})$$

The number of OH<sup>-</sup> ligand bound to the Er hydroxyl complexes ( $\sum n[\text{Er}(\text{OH})_n^{3-n}]$ ) in the experimental solution is averaged by the total Er concentration  $[\text{Er}]$  in solution according to,

$$\bar{n} = \frac{\sum n[\text{Er}(\text{OH})_n^{3-n}]}{[\text{Er}]} \quad (\text{S4})$$

The total Er concentration  $[\text{Er}]$  is the sum of the concentrations of Er in the Er hydroxyl complexes and Er aqua ion,

$$[\text{Er}] = [\text{Er}^{3+}] + [\text{Er}(\text{OH})^{2+}] + [\text{Er}(\text{OH})_2^+] + [\text{Er}(\text{OH})_3^0] \quad (\text{S5})$$

With an assumption of the mass balance for the Er concentration in mCP-NaOH solutions, the total Er concentration  $[\text{Er}]$  is the same with the molar concentration of  $\text{ErCl}_3$  added. Therefore, the average number of  $\text{OH}^-$  ligand ( $\vec{n}$ ) coordinated to  $\text{Er}^{3+}$  for each of Er-bearing mCP-NaOH solutions can be determined by reformatting the Eqs. S4 with S3 as shown.

$$\vec{n} = \frac{M_{\text{OH}^-} - M'_{\text{OH}^-} - M_{\text{I}2^-} + M_{\text{I}2^-} + M'_{\text{OH}^-, \text{w}} - M_{\text{OH}^-, \text{w}}}{[\text{Er}]} \quad (\text{S6})$$

The amount of  $\text{OH}^-$  in each of Er-absent ( $M_{\text{OH}^-}$ ) and Er-bearing ( $M'_{\text{OH}^-}$ ) mCP-NaOH solutions were determined by pH determination using the UV-Vis/mCP method from Eq. 4.

**Table S1.** UV-Vis spectrophotometric experiments of 0.03 mM mCP in HCl, NaOH, and Tris solutions at temperatures from 25 to 75 °C.

| Exp | $T$<br>(°C) | Acidic pH                |                                  |                                  | Alkaline pH              |                                  |                                  | pH of known buffer solution |                                        |                                  |                                  |
|-----|-------------|--------------------------|----------------------------------|----------------------------------|--------------------------|----------------------------------|----------------------------------|-----------------------------|----------------------------------------|----------------------------------|----------------------------------|
|     |             | HCl <sup>a</sup><br>(mM) | Absorbance<br>of HI <sup>-</sup> | Absorbance<br>of I <sup>2-</sup> | NaOH <sup>a</sup><br>(M) | Absorbance<br>of HI <sup>-</sup> | Absorbance<br>of I <sup>2-</sup> | Tris <sup>a</sup><br>(M)    | pH by<br>potentiometric<br>measurement | Absorbance<br>of HI <sup>-</sup> | Absorbance<br>of I <sup>2-</sup> |
| 1   | 25          | 0.10                     | 0.4789                           | 0.0022                           | 0.01                     | 0.0683                           | 1.2590                           | 0.02                        | 8.07                                   | 0.4099                           | 0.2437                           |
| 2   | 25          | 0.10                     | 0.4956                           | 0.0022                           | 0.01                     | 0.0626                           | 1.1737                           | 0.02                        | 8.08                                   | 0.4023                           | 0.2569                           |
| 3   | 25          | 0.10                     | 0.4978                           | 0.0019                           | 0.01                     | 0.0641                           | 1.1514                           | 0.02                        | 8.08                                   | 0.3639                           | 0.2286                           |
| 4   | 25          | 0.10                     | 0.5109                           | 0.0039                           | 0.01                     | 0.0638                           | 1.1526                           | 0.02                        | 8.06                                   | 0.4330                           | 0.2372                           |
| 5   | 25          | 0.10                     | 0.5077                           | 0.0035                           | 0.01                     | 0.0638                           | 1.1545                           | 0.02                        | 8.05                                   | 0.4223                           | 0.2408                           |
| 6   | 25          | 0.10                     | 0.5048                           | 0.0023                           | 0.01                     | 0.0594                           | 1.1150                           | 0.02                        | 8.05                                   | 0.4247                           | 0.2434                           |
| 7   | 25          | 0.10                     | 0.4941                           | 0.0018                           | 0.01                     | 0.0594                           | 1.1223                           | 0.02                        | 8.02                                   | 0.4207                           | 0.2310                           |
| 8   | 25          | 0.10                     | 0.4937                           | 0.0011                           | 0.01                     | 0.0592                           | 1.1193                           | 0.02                        | 8.06                                   | 0.4101                           | 0.2432                           |
| 9   | 25          | 0.10                     | 0.4956                           | 0.0009                           | 0.01                     | 0.0638                           | 1.1164                           | 0.02                        | 8.05                                   | 0.4205                           | 0.2091                           |
| 10  | 25          | 0.10                     | 0.4995                           | 0.0019                           | 0.01                     | 0.0642                           | 1.1197                           | 0.02                        | 8.08                                   | 0.4094                           | 0.2378                           |
| 11  | 25          | 0.10                     | 0.4978                           | 0.0025                           | 0.01                     | 0.0641                           | 1.1237                           | 0.02                        | 8.13                                   | 0.3973                           | 0.2733                           |
| 12  | 25          | 0.10                     | 0.4996                           | 0.0022                           | 0.01                     | 0.0660                           | 1.1579                           | 0.02                        | 8.12                                   | 0.3967                           | 0.2543                           |
| 13  | 25          | 0.10                     | 0.5054                           | 0.0011                           | 0.01                     | 0.0656                           | 1.1533                           | 0.02                        | 8.08                                   | 0.4262                           | 0.2249                           |
| 14  | 25          | 0.10                     | 0.5036                           | 0.0008                           | 0.01                     | 0.0652                           | 1.1484                           | 0.02                        | 8.08                                   | 0.4287                           | 0.2180                           |
| 15  | 25          | 0.10                     | 0.5057                           | 0.0006                           | 0.01                     | 0.0649                           | 1.1190                           | 0.02                        | 8.07                                   | 0.4265                           | 0.2177                           |
| 16  | 25          | 0.10                     | 0.4990                           | 0.0031                           | 0.01                     | 0.0637                           | 1.1174                           | 0.02                        | 8.07                                   | 0.3960                           | 0.2925                           |
| 17  | 25          | 0.10                     | 0.5004                           | 0.0033                           | 0.01                     | 0.0628                           | 1.1166                           | 0.02                        | 8.09                                   | 0.3956                           | 0.3084                           |
| 18  | 35          | 0.10                     | 0.4946                           | 0.0067                           | 0.01                     | 0.0674                           | 1.1004                           | 0.02                        | 7.82                                   | 0.4207                           | 0.2040                           |
| 19  | 35          | 0.10                     | 0.4901                           | 0.0025                           | 0.01                     | 0.0655                           | 1.0961                           | 0.02                        | 7.86                                   | 0.4249                           | 0.2179                           |
| 20  | 35          | 0.10                     | 0.4928                           | 0.0028                           | 0.01                     | 0.0643                           | 1.0962                           | 0.02                        | 7.84                                   | 0.4287                           | 0.2103                           |
| 21  | 35          | 0.10                     | 0.4882                           | 0.0008                           | 0.01                     | 0.0633                           | 1.1077                           | 0.02                        | 7.87                                   | 0.4087                           | 0.2095                           |
| 22  | 35          | 0.10                     | 0.4901                           | 0.0003                           | 0.01                     | 0.0634                           | 1.1079                           | 0.02                        | 7.80                                   | 0.4152                           | 0.1850                           |
| 23  | 35          | 0.10                     | 0.4905                           | 0.0002                           | 0.01                     | 0.0631                           | 1.1021                           | 0.02                        | 7.86                                   | 0.4099                           | 0.2063                           |
| 24  | 35          | 0.10                     | 0.4919                           | 0.0036                           | 0.01                     | 0.0657                           | 1.1022                           | 0.02                        | 7.89                                   | 0.4029                           | 0.2312                           |

|    |    |      |        |        |      |        |        |      |      |        |        |
|----|----|------|--------|--------|------|--------|--------|------|------|--------|--------|
| 25 | 35 | 0.10 | 0.4906 | 0.0013 | 0.01 | 0.0652 | 1.0998 | 0.02 | 7.77 | 0.4182 | 0.1863 |
| 26 | 35 | 0.10 | 0.4913 | 0.0015 | 0.01 | 0.0662 | 1.1040 | 0.02 | 7.83 | 0.4141 | 0.2109 |
| 27 | 35 | 0.10 | 0.4885 | 0.0026 | 0.01 | 0.0564 | 1.0945 | 0.02 | 7.80 | 0.4175 | 0.1858 |
| 28 | 35 | 0.10 | 0.4897 | 0.0024 | 0.01 | 0.0564 | 1.0932 | 0.02 | 7.87 | 0.4105 | 0.2154 |
| 29 | 35 | 0.10 | 0.4898 | 0.0026 | 0.01 | 0.0559 | 1.0923 | 0.02 | 7.90 | 0.4028 | 0.2289 |
| 30 | 35 | 0.10 | 0.5065 | 0.0019 | 0.01 | 0.0660 | 1.1044 | 0.02 | 7.90 | 0.3956 | 0.2263 |
| 31 | 35 | 0.10 | 0.4899 | 0.0009 | 0.01 | 0.0658 | 1.1094 | 0.02 | 7.91 | 0.3945 | 0.2365 |
| 32 | 35 | 0.10 | 0.4902 | 0.0012 | 0.01 | 0.0659 | 1.1062 | -    | -    | -      | -      |
| 33 | 45 | 0.10 | 0.4799 | 0.0025 | 0.01 | 0.0650 | 1.0717 | 0.02 | 7.53 | 0.4320 | 0.1296 |
| 34 | 45 | 0.10 | 0.4812 | 0.0025 | 0.01 | 0.0655 | 1.0725 | 0.02 | 7.59 | 0.3994 | 0.1402 |
| 35 | 45 | 0.10 | 0.4816 | 0.0025 | 0.01 | 0.0664 | 1.0796 | 0.02 | 7.48 | 0.4376 | 0.1185 |
| 36 | 45 | 0.10 | 0.4800 | 0.0025 | 0.01 | 0.0670 | 1.0905 | -    | -    | -      | -      |
| 37 | 50 | 0.10 | 0.4796 | 0.0041 | 0.01 | 0.0696 | 1.0517 | 0.02 | 7.54 | 0.4369 | 0.1022 |
| 38 | 50 | 0.10 | 0.4752 | 0.0035 | 0.01 | 0.0663 | 1.0499 | 0.02 | 7.32 | 0.4384 | 0.0829 |
| 39 | 50 | 0.10 | 0.4793 | 0.0036 | 0.01 | 0.0661 | 1.0446 | 0.02 | 7.32 | 0.4408 | 0.0899 |
| 40 | 50 | 0.10 | 0.4805 | 0.0035 | 0.01 | 0.0671 | 1.0524 | 0.02 | 7.24 | 0.4435 | 0.0695 |
| 41 | 50 | 0.10 | 0.4871 | 0.0137 | 0.01 | 0.0669 | 1.0490 | 0.02 | 7.32 | 0.4490 | 0.0834 |
| 42 | 50 | 0.10 | 0.4855 | 0.0135 | 0.01 | 0.0654 | 1.0475 | 0.02 | 7.36 | 0.4498 | 0.0889 |
| 43 | 50 | 0.10 | 0.4881 | 0.0136 | 0.01 | 0.0659 | 1.0515 | 0.02 | 7.34 | 0.4532 | 0.0884 |
| 44 | 75 | 0.10 | 0.4600 | 0.0053 | 0.01 | 0.0721 | 0.9872 | 0.02 | 7.43 | 0.4522 | 0.1139 |
| 45 | 75 | 0.10 | 0.4655 | 0.0050 | 0.01 | 0.0693 | 0.9873 | 0.02 | 7.37 | 0.4233 | 0.0839 |
| 46 | 75 | 0.10 | 0.4602 | 0.0044 | 0.01 | 0.0694 | 0.9595 | 0.02 | 7.71 | 0.4158 | 0.1638 |
| 47 | 75 | 0.10 | 0.4647 | 0.0191 | 0.01 | 0.0633 | 0.9969 | 0.02 | 7.56 | 0.4193 | 0.1373 |
| 48 | 75 | 0.10 | 0.4699 | 0.0201 | 0.01 | 0.0769 | 0.9916 | 0.02 | 7.54 | 0.4109 | 0.1432 |
| 49 | 75 | 0.10 | 0.4630 | 0.0035 | 0.01 | 0.0729 | 0.9948 | 0.02 | 7.54 | 0.4182 | 0.1863 |
| 50 | 75 | 0.10 | 0.4616 | 0.0016 | -    | -      | -      | 0.02 | 7.59 | 0.4141 | 0.2109 |
| 51 | 75 | 0.10 | 0.4627 | 0.0067 | -    | -      | -      | 0.02 | 7.52 | 0.4175 | 0.1858 |
| 52 | 75 | -    | -      | -      | -    | -      | -      | 0.02 | 7.46 | 0.4102 | 0.1031 |

<sup>a</sup>Concentration at room temperature.

**Table S2.** UV-Vis spectrophotometric experiments of solutions containing mCP and NaOH with addition of varying Er concentrations from 0.0 to ~0.057 mM at 25 °C ( $\text{Er}^{3+} + n\text{H}_2\text{O} = \text{Er}(\text{OH})_n^{3-n} + n\text{H}^+$ , with  $n=1$  to 3).

| Exp     | NaOH (mM) | Er (mM) | mCP (mM) | Abs <sub>435nm</sub> | Abs <sub>578nm</sub> | <i>R</i> | pH by potentiometric measurement | pH by UV-Vis | Average number of OH <sup>-</sup> ligand ( $\bar{n}$ ) |
|---------|-----------|---------|----------|----------------------|----------------------|----------|----------------------------------|--------------|--------------------------------------------------------|
| Er-a-0  | 0.125     | 0.000   | 0.029    | 0.1109               | 1.0605               | 9.56     | 9.64                             | 9.60         | -                                                      |
| Er-a-1  | 0.125     | 0.011   | 0.029    | 0.1392               | 0.9355               | 6.72     | 9.42                             | 9.32         | 3.11                                                   |
| Er-a-2  | 0.125     | 0.017   | 0.029    | 0.1975               | 0.7811               | 3.95     | 9.07                             | 8.99         | 2.93                                                   |
| Er-a-3  | 0.126     | 0.023   | 0.029    | 0.2769               | 0.5773               | 2.08     | 8.77                             | 8.66         | 2.67                                                   |
| Er-a-4  | 0.125     | 0.029   | 0.029    | 0.3876               | 0.2850               | 0.74     | 8.24                             | 8.17         | 2.49                                                   |
| Er-a-5  | 0.126     | 0.034   | 0.029    | 0.4534               | 0.1144               | 0.25     | 7.39                             | 7.69         | 2.24                                                   |
| Er-a-6  | 0.126     | 0.040   | 0.029    | 0.4738               | 0.0701               | 0.15     | 7.18                             | 7.45         | 1.96                                                   |
| Er-a-7  | 0.125     | 0.046   | 0.029    | 0.4755               | 0.0523               | 0.11     | 7.07                             | 7.31         | 1.72                                                   |
| Er-a-8  | 0.126     | 0.051   | 0.029    | 0.4816               | 0.0444               | 0.09     | 7.03                             | 7.23         | 1.54                                                   |
| Er-a-9  | 0.125     | 0.057   | 0.029    | 0.4848               | 0.0351               | 0.07     | 6.96                             | 7.12         | 1.38                                                   |
| Er-b-0  | 0.125     | 0.000   | 0.029    | 0.1084               | 1.0200               | 9.41     | 9.65                             | 9.56         | -                                                      |
| Er-b-1  | 0.126     | 0.006   | 0.029    | 0.1323               | 0.9636               | 7.28     | 9.31                             | 9.38         | 2.79                                                   |
| Er-b-2  | 0.125     | 0.012   | 0.029    | 0.1696               | 0.8649               | 5.10     | 9.16                             | 9.14         | 2.48                                                   |
| Er-b-3  | 0.125     | 0.017   | 0.029    | 0.2331               | 0.7067               | 3.03     | 8.81                             | 8.85         | 2.27                                                   |
| Er-b-4  | 0.125     | 0.023   | 0.029    | 0.3408               | 0.4199               | 1.23     | 8.38                             | 8.41         | 2.21                                                   |
| Er-b-5  | 0.125     | 0.029   | 0.029    | 0.4386               | 0.1644               | 0.37     | 7.29                             | 7.86         | 2.06                                                   |
| Er-b-6  | 0.125     | 0.035   | 0.029    | 0.4662               | 0.0898               | 0.19     | 6.96                             | 7.57         | 1.79                                                   |
| Er-b-7  | 0.126     | 0.040   | 0.029    | 0.4789               | 0.0591               | 0.12     | 6.91                             | 7.36         | 1.57                                                   |
| Er-b-8  | 0.125     | 0.046   | 0.029    | 0.4796               | 0.0474               | 0.10     | 6.86                             | 7.26         | 1.37                                                   |
| Er-b-9  | 0.125     | 0.052   | 0.029    | 0.4843               | 0.0416               | 0.09     | 6.71                             | 7.20         | 1.23                                                   |
| Er-b-10 | 0.125     | 0.058   | 0.029    | 0.4831               | 0.0362               | 0.07     | 6.70                             | 7.14         | 1.10                                                   |
| Er-c-0  | 0.128     | 0.000   | 0.029    | 0.1079               | 1.0361               | 9.60     | 9.68                             | 9.61         | -                                                      |
| Er-c-1  | 0.128     | 0.011   | 0.029    | 0.1789               | 0.8630               | 4.83     | 9.16                             | 9.11         | 2.79                                                   |
| Er-c-2  | 0.128     | 0.017   | 0.029    | 0.2497               | 0.6789               | 2.72     | 8.72                             | 8.79         | 2.52                                                   |
| Er-c-3  | 0.128     | 0.023   | 0.029    | 0.3396               | 0.4472               | 1.32     | 8.23                             | 8.44         | 2.30                                                   |

|        |       |       |       |        |         |       |      |      |      |
|--------|-------|-------|-------|--------|---------|-------|------|------|------|
| Er-c-4 | 0.129 | 0.029 | 0.029 | 0.4375 | 0.2020  | 0.46  | 7.50 | 7.96 | 2.13 |
| Er-c-5 | 0.129 | 0.034 | 0.029 | 0.4758 | 0.0908  | 0.19  | 6.84 | 7.56 | 1.87 |
| Er-c-6 | 0.130 | 0.040 | 0.029 | 0.4876 | 0.0685  | 0.14  | 6.52 | 7.42 | 1.63 |
| Er-c-7 | 0.129 | 0.046 | 0.029 | 0.4882 | 0.0541  | 0.11  | 6.39 | 7.32 | 1.42 |
| Er-c-8 | 0.129 | 0.052 | 0.029 | 0.4921 | 0.0472  | 0.10  | 6.41 | 7.25 | 1.27 |
| Er-c-9 | 0.130 | 0.057 | 0.029 | 0.4989 | 0.0427  | 0.09  | 6.38 | 7.20 | 1.15 |
| Er-d-0 | 0.129 | 0.000 | 0.029 | 0.1030 | 1.0388  | 10.09 | 9.78 | 9.65 | -    |
| Er-d-1 | 0.130 | 0.006 | 0.029 | 0.1198 | 1.0160  | 8.48  | 9.61 | 9.50 | 2.23 |
| Er-d-2 | 0.129 | 0.013 | 0.029 | 0.1406 | 0.9465  | 6.73  | 9.42 | 9.32 | 2.04 |
| Er-d-3 | 0.129 | 0.019 | 0.029 | 0.1974 | 0.7907  | 4.00  | 8.98 | 9.00 | 2.14 |
| Er-d-4 | 0.129 | 0.026 | 0.029 | 0.2750 | 0.6024  | 2.19  | 8.57 | 8.68 | 2.00 |
| Er-d-5 | 0.129 | 0.032 | 0.029 | 0.3927 | 0.2987  | 0.76  | 8.04 | 8.18 | 1.96 |
| Er-d-6 | 0.129 | 0.038 | 0.029 | 0.4690 | 0.1010  | 0.22  | 6.91 | 7.62 | 1.79 |
| Er-d-7 | 0.129 | 0.045 | 0.029 | 0.4801 | 0.0687  | 0.14  | 6.74 | 7.43 | 1.55 |
| Er-d-8 | 0.129 | 0.051 | 0.029 | 0.4840 | 0.0552  | 0.11  | 6.61 | 7.33 | 1.36 |
| Er-d-9 | 0.130 | 0.057 | 0.029 | 0.4903 | 0.0485  | 0.10  | 6.55 | 7.26 | 1.22 |
| Er-e-0 | 0.131 | 0.000 | 0.030 | 0.1075 | 1.0159  | 9.45  | 9.43 | 9.57 | -    |
| Er-e-1 | 0.131 | 0.007 | 0.030 | 0.1303 | 0.95408 | 7.32  | 9.29 | 9.37 | 2.51 |
| Er-e-2 | 0.131 | 0.019 | 0.030 | 0.2240 | 0.72083 | 3.22  | 8.91 | 8.88 | 2.03 |
| Er-e-3 | 0.132 | 0.025 | 0.030 | 0.3006 | 0.53570 | 1.78  | 8.55 | 8.58 | 1.87 |
| Er-e-4 | 0.131 | 0.032 | 0.030 | 0.4152 | 0.23311 | 0.56  | 7.94 | 8.05 | 1.81 |
| Er-e-5 | 0.131 | 0.038 | 0.030 | 0.4564 | 0.11953 | 0.26  | 7.30 | 7.70 | 1.61 |
| Er-e-6 | 0.132 | 0.044 | 0.030 | 0.4740 | 0.07395 | 0.16  | 6.67 | 7.47 | 1.41 |
| Er-e-7 | 0.131 | 0.051 | 0.030 | 0.4790 | 0.05645 | 0.12  | 6.60 | 7.34 | 1.24 |
| Er-e-8 | 0.130 | 0.057 | 0.030 | 0.4770 | 0.04868 | 0.10  | 6.54 | 7.28 | 1.11 |

|        |       |       |       |        |        |      |      |      |      |
|--------|-------|-------|-------|--------|--------|------|------|------|------|
| Er-f-0 | 0.126 | 0.000 | 0.029 | 0.1166 | 1.0015 | 8.59 | 9.41 | 9.51 | -    |
| Er-f-1 | 0.125 | 0.029 | 0.029 | 0.4175 | 0.1974 | 0.47 | 7.79 | 7.97 | 1.77 |
| Er-f-2 | 0.126 | 0.035 | 0.029 | 0.4628 | 0.0805 | 0.17 | 7.00 | 7.52 | 1.59 |
| Er-f-3 | 0.126 | 0.040 | 0.029 | 0.4690 | 0.0640 | 0.14 | 6.78 | 7.41 | 1.39 |
| Er-f-4 | 0.126 | 0.046 | 0.029 | 0.4713 | 0.0496 | 0.11 | 6.74 | 7.29 | 1.21 |
| Er-f-5 | 0.126 | 0.052 | 0.029 | 0.4763 | 0.0394 | 0.08 | 6.72 | 7.18 | 1.09 |
| Er-f-6 | 0.126 | 0.058 | 0.029 | 0.4784 | 0.0343 | 0.07 | 6.67 | 7.12 | 0.98 |
| Er-g-0 | 0.133 | 0.000 | 0.030 | 0.1033 | 1.0274 | 9.95 | 9.80 | 9.64 | -    |
| Er-g-1 | 0.133 | 0.038 | 0.030 | 0.4233 | 0.1957 | 0.46 | 7.91 | 7.96 | 1.67 |
| Er-g-2 | 0.134 | 0.045 | 0.030 | 0.4577 | 0.1101 | 0.24 | 7.06 | 7.66 | 1.49 |
| Er-g-3 | 0.134 | 0.051 | 0.030 | 0.4681 | 0.0788 | 0.17 | 6.87 | 7.50 | 1.32 |
| Er-g-4 | 0.133 | 0.058 | 0.030 | 0.4745 | 0.0628 | 0.13 | 6.85 | 7.40 | 1.18 |
| Er-h-0 | 0.130 | 0.000 | 0.030 | 0.1132 | 1.0111 | 8.93 | 9.38 | 9.54 | -    |
| Er-h-1 | 0.130 | 0.039 | 0.030 | 0.4520 | 0.1210 | 0.27 | 7.39 | 7.71 | 1.47 |
| Er-h-2 | 0.130 | 0.045 | 0.030 | 0.4752 | 0.0685 | 0.14 | 7.07 | 7.43 | 1.31 |
| Er-h-3 | 0.130 | 0.051 | 0.030 | 0.4811 | 0.0552 | 0.11 | 6.59 | 7.33 | 1.15 |
| Er-h-4 | 0.131 | 0.057 | 0.030 | 0.4843 | 0.0479 | 0.10 | 6.54 | 7.26 | 1.04 |

---



**Table S3.** Sources of thermodynamic data from the Supcrt92 dataset considered in the Er aqueous speciation as function of pH calculated at 25 °C using GEMS code package and the aquifer groundwater of the Zudong heavy REE deposit described in the study by Li et al. <sup>8</sup>.

|               | Species                                                                                                            | Refs. |
|---------------|--------------------------------------------------------------------------------------------------------------------|-------|
|               | $\text{Er}^{3+}$                                                                                                   | 1, 2  |
|               | $\text{Er}(\text{OH})^{2+}$ , $\text{Er}(\text{OH})_2^+$ , $\text{Er}(\text{OH})_3^0$ , $\text{Er}(\text{OH})_4^-$ | 3     |
| Er-species    | $\text{Er}(\text{CO}_3)^+$ , $\text{Er}(\text{HCO}_3)^{2+}$                                                        | 4     |
|               | $\text{ErF}_2^+$                                                                                                   | 4     |
|               | $\text{ErCl}^{2+}$                                                                                                 | 5     |
|               | $\text{Er}(\text{SO}_4)^+$                                                                                         | 6     |
| Other species | $\text{H}^+$ , $\text{OH}^-$                                                                                       | 1, 2  |

References: <sup>1</sup>Shock et al. (1997); <sup>2</sup>Shock and Helgeson (1988); <sup>3</sup>Haas et al. (1995); <sup>4</sup>Sverjensky et al. (1997); <sup>5</sup>Migdisov et al. (2009); <sup>6</sup>Migdisov et al. (2016).
